# Supplementary material for: Integration of high-throughput reporter assays identify a critical enhancer of the Ikzf1 gene
Source: PubMed Central journal article supplement (PMC7250416; doi:10.1371/journal.pone.0233191), 2020-05-26
Supplement: pone.0233191.s001.pdf [file pone.0233191.s001.pdf]

**A**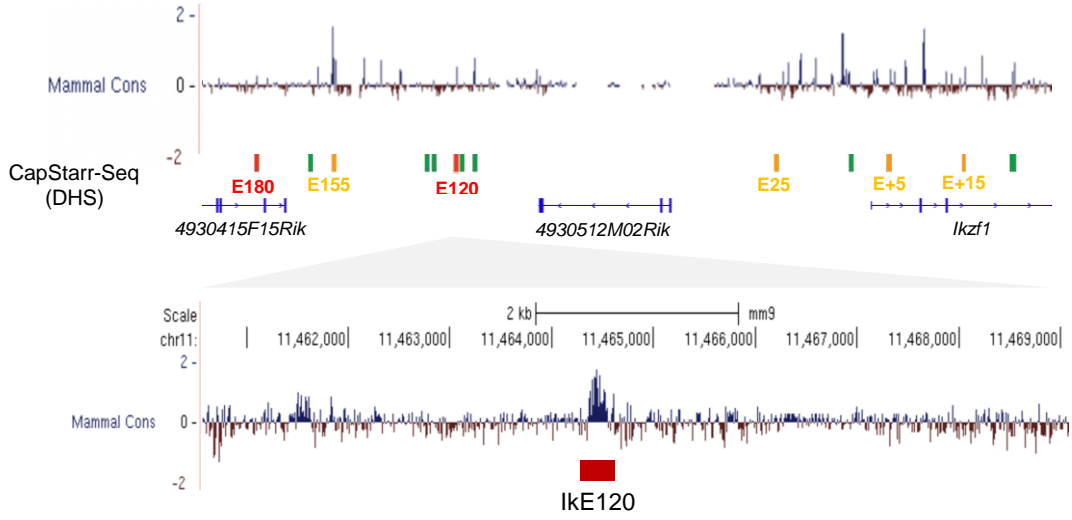**B**

chr7:50,135,522-50,407,720 (H38)

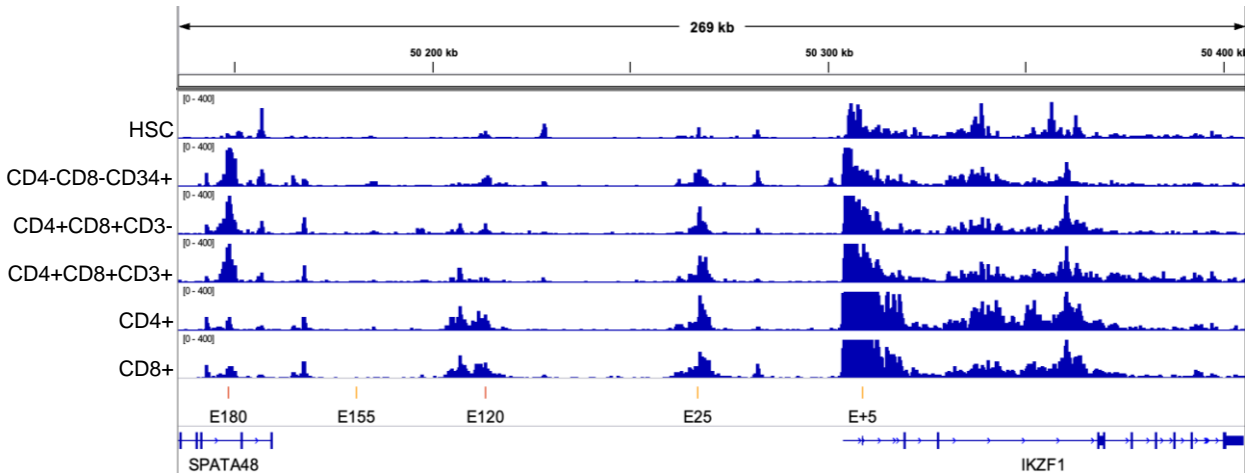**S1 Fig**
