# Supplementary material for: Integration of high-throughput reporter assays identify a critical enhancer of the Ikzf1 gene
Source: PubMed Central journal article supplement (PMC7250416; doi:10.1371/journal.pone.0233191), 2020-05-26
Supplement: pone.0233191.s002.pdf [file pone.0233191.s002.pdf]

**A**

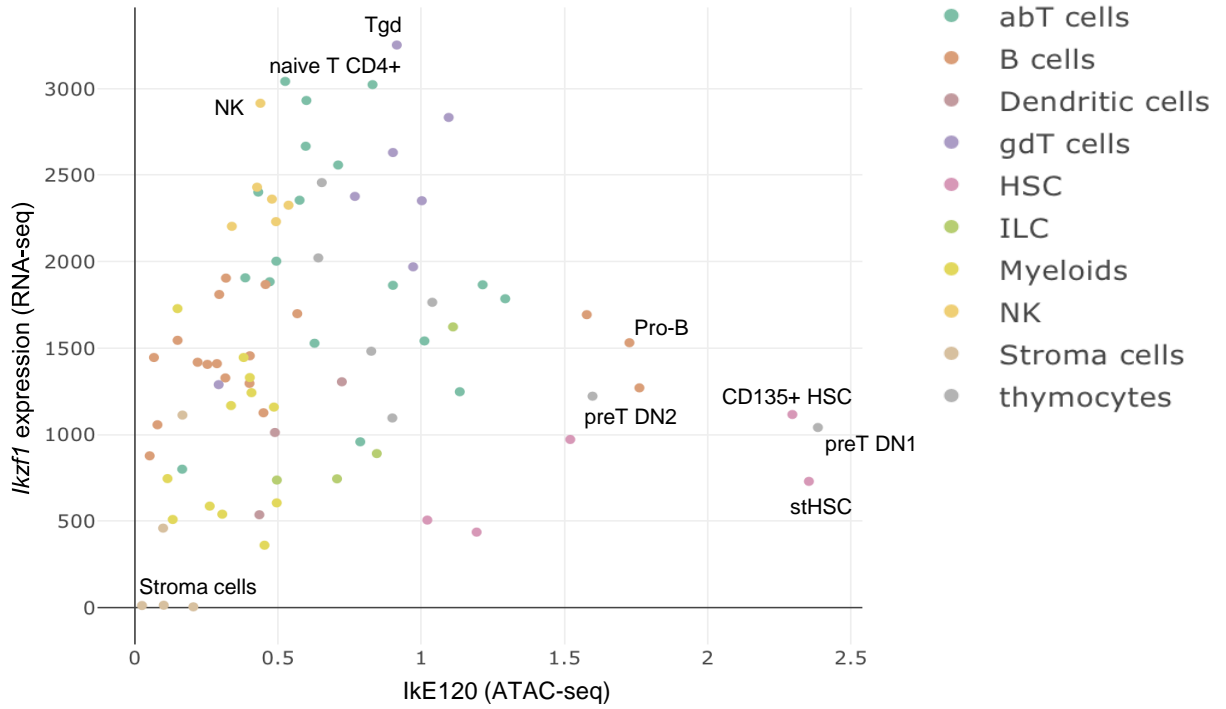

**B**

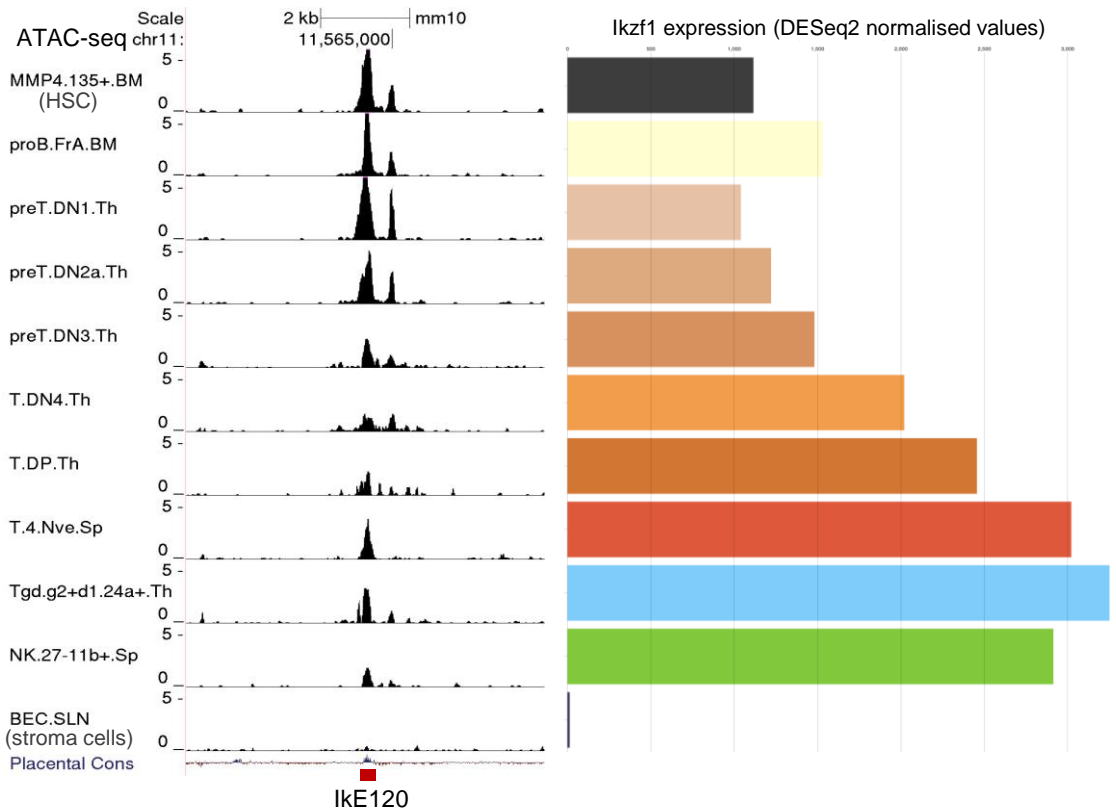

**S2 Fig**
