# Supplementary material for: Integration of high-throughput reporter assays identify a critical enhancer of the Ikzf1 gene
Source: PubMed Central journal article supplement (PMC7250416; doi:10.1371/journal.pone.0233191), 2020-05-26
Supplement: pone.0233191.s005.pdf [file pone.0233191.s005.pdf]

**S3 Table. Primer sequences for CRISPR**

| Sequence (5' - 3')    | Name                  |
|-----------------------|-----------------------|
| C-AAGAAGAGAGATCAACGCA | gRNA_Ikzf1_Upstream   |
| ACTGTTATAGGCTTTTCCA-G | gRNA_Ikzf1_Downstream |
| GTTCAGGCAAATTTTCAGAGG | Ikzf1_F               |
| CTGGGAGGGTACTACTGCTC  | Ikzf1_R               |
