# Supplementary material for: Integration of high-throughput reporter assays identify a critical enhancer of the Ikzf1 gene
Source: PubMed Central journal article supplement (PMC7250416; doi:10.1371/journal.pone.0233191), 2020-05-26
Supplement: pone.0233191.s006.pdf [file pone.0233191.s006.pdf]

**S4 Table. Primer sequences/ RT-qPCR**

| Sequences (5'- 3')-R  | Sequences (5'- 3')-F   | Name         |
|-----------------------|------------------------|--------------|
| GGGATTGGTGACTCTGATGG  | GCTGCTGATGTGCAACAAA    | RPL32        |
| TTGACCCTCATCGACATCCA  | CGCCCCAGGATCATTCTTG    | IKZF1_E1L    |
| TTGACCCTCATCGACATCCA  | TTTGTGTGGCAGAGAGAGACA  | IKZF1_E1S    |
| GCTCATCCCCTTCATCTGGA  | TGGATGTCGATGAGGGTCAA   | IKZF1_E2-E3  |
| CACACTGGTTGCACTGGAAA  | ATCTGTGGGATCGTTTGCATC  | IKZF1_E4-E5  |
| CGCGCTGCTCCTCCTTGAGA  | ACAGCGCAGCGGCCTTATCT   | IKZF1_E8     |
| TTCATGTCTTGCAACCCCTCA | TCCATTTCCCCTGCCATAGTTT | eRNA-Ik (5') |
| AGACACTGAGATGGGAAGGGA | CAAAGGGAGCTGGGGATGAG   | eRNA-Ik (3') |
