# Supplementary material for: Integration of high-throughput reporter assays identify a critical enhancer of the Ikzf1 gene
Source: PubMed Central journal article supplement (PMC7250416; doi:10.1371/journal.pone.0233191), 2020-05-26
Supplement: pone.0233191.s008.pdf [file pone.0233191.s008.pdf]

**S1 Table. List of DHSs associated with Ikzf1.** The enhancer activity as assessed by CapStarr-seq in the P5424 cell line is indicated.

| <b>Coordiantes</b>      | <b>Enhancer activity</b> | <b>Enhancer name</b> |
|-------------------------|--------------------------|----------------------|
| chr11:11406270-11406453 | strong                   | E180                 |
| chr11:11421901-11422088 | inactive                 |                      |
| chr11:11428864-11429017 | weak                     | E155                 |
| chr11:11455715-11455824 | inactive                 |                      |
| chr11:11457668-11457851 | inactive                 |                      |
| chr11:11464295-11464600 | strong                   | E120                 |
| chr11:11465199-11465308 | inactive                 |                      |
| chr11:11469533-11469761 | inactive                 |                      |
| chr11:11557248-11557441 | weak                     | E25                  |
| chr11:11579095-11579318 | inactive                 |                      |
| chr11:11589984-11590137 | weak                     | E+5                  |
| chr11:11590190-11590299 | weak                     | E+5                  |
| chr11:11611793-11612034 | weak                     | E+15                 |
| chr11:11625705-11625906 | inactive                 |                      |
| chr11:11625985-11626168 | inactive                 |                      |
| chr11:11626256-11626493 | inactive                 |                      |
